# Supplementary material for: Increasing gap in human height between rich and poor countries associated to their different intakes of N and P
Source: Springer Nature journal article supplement (doi:10.1038/s41598-017-17880-3), 2017-12-11

## Supplementary material: Increasing gap in human height between rich and poor countries associated to their different intakes of N and P.

Josep Peñuelas<sup>1,2</sup>, Ivan A. Janssens<sup>3</sup>, Philippe Ciais<sup>4</sup>, Michael Obersteiner<sup>5</sup>, Tamás Krisztin<sup>5</sup>, Shilong Piao<sup>6</sup>, Jordi Sardans<sup>1,2</sup>

<sup>1</sup> CSIC, Global Ecology Unit CREAM-CEAB-UAB, Cerdanyola del Vallès, 08193 Catalonia, Spain.

<sup>2</sup> CREAM, Cerdanyola del Vallès, 08193 Catalonia, Spain.

<sup>3</sup> Research Group of Plant and Vegetation Ecology (PLECO), Department of Biology, University of Antwerp, B-2610 Wilrijk, Belgium.

<sup>4</sup> Laboratoire des Sciences du Climat et de l'Environnement, IPSL, 91191 Gif-sur-Yvette, France.

<sup>5</sup> International Institute for Applied Systems Analysis (IIASA),

Ecosystems Services and Management, Schlossplatz 1, A-2361 Laxenburg, Austria.

<sup>6</sup>Sino-French Institute for Earth System Science, College of Urban and Environmental Sciences, Peking University, Beijing 100871, China.

\*Correspondence to: josep.penuelas@uab.cat

Table S1. Average annual N and P intake from animal and plant sources and animal/plant ratio of N and P intake during the period 1980-2009 (coinciding with the growth period of the 1980s cohort). We established two groups of countries those with: N (animal/plant) + P (animal/plant) > 2 and those with: N (animal/plant) + P (animal/plant) < 2, to separate the countries with most N and P intake coming from animal food sources from those most N and P intake coming from plant food sources. In bold type are highlighted the countries with: N (animal/plant) + P (animal/plant) > 2.

| Country        | Annual N intake (kg) from animals | Annual N intake (kg) from plants | N (animal/plant) | Annual P intake (kg) from animals | Annual P intake (kg) from plants | P (animal/plant) |
|----------------|-----------------------------------|----------------------------------|------------------|-----------------------------------|----------------------------------|------------------|
| Bangladesh     | 1.27                              | 7.73                             | 0.165            | 0.124                             | 1.43                             | 0.086            |
| <b>Belgium</b> | <b>13.7</b>                       | <b>7.00</b>                      | <b>1.96</b>      | <b>1.30</b>                       | <b>1.01</b>                      | <b>1.29</b>      |
| Bolivia        | 4.37                              | 5.79                             | 0.754            | 0.357                             | 0.872                            | 0.409            |
| Botswana       | 4.87                              | 5.68                             | 0.857            | 0.539                             | 0.766                            | 0.703            |
| Brazil         | 7.51                              | 5.94                             | 1.26             | 0.708                             | 0.906                            | 0.782            |
| Burkina        | 1.72                              | 11.7                             | 0.147            | 0.158                             | 1.13                             | 0.139            |
| Cabo Verde     | 4.85                              | 5.39                             | 0.900            | 0.492                             | 0.834                            | 0.589            |
| Cambodia       | 1.95                              | 7.87                             | 0.248            | 0.150                             | 1.50                             | 0.100            |
| Cameroon       | 2.11                              | 6.35                             | 0.332            | 0.179                             | 0.892                            | 0.200            |
| <b>Canada</b>  | <b>13.4</b>                       | <b>7.01</b>                      | <b>1.91</b>      | <b>1.30</b>                       | <b>0.957</b>                     | <b>1.35</b>      |
| Chad           | 2.05                              | 5.73                             | 0.356            | 0.194                             | 0.844                            | 0.230            |
| Chile          | 7.20                              | 6.38                             | 1.13             | 0.678                             | 0.940                            | 0.721            |
| China          | 3.95                              | 8.27                             | 0.478            | 0.299                             | 1.38                             | 0.216            |
| Colombia       | 8.18                              | 6.91                             | 1.18             | 0.641                             | 1.08                             | 0.591            |
| Congo          | 5.90                              | 5.25                             | 1.12             | 0.613                             | 0.842                            | 0.728            |

|                             |             |             |             |              |              |              |
|-----------------------------|-------------|-------------|-------------|--------------|--------------|--------------|
| <b>Denmark</b>              | <b>14.1</b> | <b>6.12</b> | <b>2.30</b> | <b>1.33</b>  | <b>0.915</b> | <b>1.45</b>  |
| Djibouti                    | 2.96        | 4.19        | 0.707       | 0.326        | 0.680        | 0.479        |
| Egypt                       | 3.31        | 9.61        | 0.344       | 0.308        | 1.46         | 0.210        |
| <b>Finland</b>              | <b>15.3</b> | <b>5.68</b> | <b>2.70</b> | <b>1.61</b>  | <b>0.850</b> | <b>1.90</b>  |
| Gabon                       | 6.75        | 6.41        | 1.05        | 0.525        | 1.01         | 0.520        |
| <b>Germany</b>              | <b>13.4</b> | <b>6.27</b> | <b>2.14</b> | <b>1.28</b>  | <b>0.924</b> | <b>1.38</b>  |
| Ghana                       | 2.36        | 6.06        | 0.390       | 0.188        | 0.974        | 0.193        |
| <b>Greece</b>               | <b>13.2</b> | <b>9.86</b> | <b>1.34</b> | <b>1.30</b>  | <b>1.40</b>  | <b>0.924</b> |
| Guatemala                   | 2.99        | 5.13        | 0.582       | 0.287        | 0.727        | 0.394        |
| Guinea                      | 1.32        | 7.55        | 0.175       | 0.118        | 1.29         | 0.092        |
| Guyana                      | 6.08        | 7.03        | 0.865       | 0.578        | 1.21         | 0.477        |
| Haiti                       | 1.43        | 5.46        | 0.261       | 0.127        | 0.818        | 0.155        |
| Honduras                    | 4.39        | 4.49        | 0.976       | 0.476        | 0.657        | 0.723        |
| India                       | 2.08        | 7.14        | 0.292       | 0.248        | 1.17         | 0.212        |
| Indonesia                   | 1.94        | 8.31        | 0.234       | 0.156        | 1.51         | 0.103        |
| Iran                        | 3.82        | 9.16        | 0.417       | 0.364        | 1.36         | 0.268        |
| <b>Ireland</b>              | <b>15.6</b> | <b>7.12</b> | <b>2.19</b> | <b>1.61</b>  | <b>1.05</b>  | <b>1.53</b>  |
| <b>Italy</b>                | <b>13.9</b> | <b>8.42</b> | <b>1.65</b> | <b>1.33</b>  | <b>1.19</b>  | <b>1.11</b>  |
| Jamaica                     | 7.07        | 5.84        | 1.21        | 0.663        | 0.905        | 0.732        |
| <b>Japan</b>                | <b>9.48</b> | <b>6.72</b> | <b>1.41</b> | <b>0.826</b> | <b>1.05</b>  | <b>0.785</b> |
| Jordan                      | 4.76        | 6.83        | 0.697       | 0.458        | 0.997        | 0.459        |
| Kenya                       | 3.89        | 5.07        | 0.767       | 0.451        | 0.720        | 0.626        |
| Lesotho                     | 2.00        | 6.56        | 0.305       | 0.179        | 0.963        | 0.186        |
| Liberia                     | 1.36        | 6.49        | 0.209       | 0.104        | 1.15         | 0.091        |
| Madagascar                  | 2.79        | 7.02        | 0.397       | 0.269        | 1.28         | 0.210        |
| Malawi                      | 0.961       | 6.01        | 0.160       | 0.081        | 0.852        | 0.095        |
| Mali                        | 3.69        | 6.92        | 0.533       | 0.389        | 1.12         | 0.348        |
| Mexico                      | 7.25        | 6.31        | 1.15        | 0.696        | 0.895        | 0.777        |
| Morocco                     | 2.93        | 8.59        | 0.341       | 0.257        | 1.24         | 0.207        |
| Mozambique                  | 0.861       | 4.78        | 0.180       | 0.071        | 0.778        | 0.091        |
| Myanmar                     | 2.32        | 6.49        | 0.358       | 0.192        | 1.18         | 0.162        |
| Namibia                     | 4.25        | 5.24        | 0.811       | 0.405        | 0.815        | 0.496        |
| Nepal                       | 1.96        | 7.46        | 0.264       | 0.211        | 1.28         | 0.165        |
| <b>Netherlands</b>          | <b>16.1</b> | <b>5.67</b> | <b>2.83</b> | <b>1.66</b>  | <b>0.813</b> | <b>2.04</b>  |
| Nicaragua                   | 3.24        | 4.59        | 0.705       | 0.336        | 0.706        | 0.476        |
| Niger                       | 2.93        | 6.85        | 0.428       | 0.287        | 1.10         | 0.262        |
| Nigeria                     | 1.54        | 7.99        | 0.192       | 0.128        | 1.10         | 0.116        |
| Norway                      | <b>14.1</b> | <b>6.20</b> | <b>2.27</b> | <b>1.42</b>  | <b>0.907</b> | <b>1.57</b>  |
| Panama                      | 5.98        | 4.91        | 1.22        | 0.531        | 0.800        | 0.663        |
| Peru                        | 4.11        | 5.71        | 0.720       | 0.401        | 0.908        | 0.442        |
| Philippines                 | 3.96        | 6.96        | 0.570       | 0.314        | 1.21         | 0.259        |
| Portugal                    | <b>12.2</b> | <b>8.15</b> | <b>1.49</b> | <b>1.11</b>  | <b>1.22</b>  | <b>0.907</b> |
| Korea                       | 6.20        | 10.6        | 0.586       | 0.484        | 1.65         | 0.294        |
| Rwanda                      | 0.843       | 6.76        | 0.125       | 0.090        | 0.832        | 0.109        |
| Senegal                     | 3.27        | 6.49        | 0.505       | 0.296        | 1.09         | 0.270        |
| Sierra Leona                | 1.67        | 7.72        | 0.217       | 0.139        | 1.17         | 0.118        |
| South Africa                | 4.97        | 5.98        | 0.832       | 0.446        | 0.902        | 0.494        |
| <b>Spain</b>                | <b>13.7</b> | <b>7.68</b> | <b>1.78</b> | <b>1.25</b>  | <b>1.11</b>  | <b>1.13</b>  |
| Sri Lanka                   | 2.29        | 6.96        | 0.329       | 0.228        | 1.26         | 0.181        |
| Swaziland                   | 3.81        | 6.81        | 0.560       | 0.384        | 0.810        | 0.474        |
| <b>Sweden</b>               | <b>15.5</b> | <b>5.53</b> | <b>2.81</b> | <b>1.60</b>  | <b>0.810</b> | <b>1.97</b>  |
| Togo                        | 1.33        | 6.04        | 0.220       | 0.104        | 0.941        | 0.111        |
| Trinidad                    | 6.80        | 5.84        | 1.17        | 0.677        | 0.875        | 0.774        |
| Uganda                      | 2.15        | 9.13        | 0.236       | 0.206        | 0.929        | 0.222        |
| <b>United Arab emirates</b> | <b>11.5</b> | <b>9.04</b> | <b>1.27</b> | <b>1.09</b>  | <b>1.35</b>  | <b>0.811</b> |
| <b>United Kingdom</b>       | <b>12.6</b> | <b>6.30</b> | <b>2.00</b> | <b>1.27</b>  | <b>0.922</b> | <b>1.37</b>  |
| Tanzania                    | 2.04        | 8.12        | 0.251       | 0.194        | 1.05         | 0.185        |
| <b>USA</b>                  | <b>16.0</b> | <b>6.87</b> | <b>2.33</b> | <b>1.61</b>  | <b>0.974</b> | <b>1.65</b>  |
| Viet Nam                    | 2.65        | 7.38        | 0.359       | 0.199        | 1.37         | 0.145        |
| Yemen                       | 2.31        | 5.92        | 0.391       | 0.216        | 0.879        | 0.246        |
| Zambia                      | 1.76        | 5.60        | 0.315       | 0.142        | 0.788        | 0.180        |
| Zimbabwe                    | 2.07        | 5.09        | 0.407       | 0.209        | 0.703        | 0.297        |

Table S2. Average GDP during the period 1980-2009 (coinciding with the growth period of the 1980s cohort), average daily dietary energy consumption per capita (2006-2008), men height average by country (1980s cohort), average percent of urban population during the period 1990-2009, average human development index (HDI) (1990-2015) and percentage of low weight infants at birth (less than 2500 g) (1980s cohort).

| Country        | GDP (\$) | Calories intake | Height (cm) | Urban population (pct) | HDI   | % low weight infants at birth |
|----------------|----------|-----------------|-------------|------------------------|-------|-------------------------------|
| Bangladesh     | 348.6    | 2270            | 162.40      | 21.766                 | 0.427 | 30                            |
| <b>Belgium</b> | 24777    | 3690            | 178.80      | 96.656                 | 0.84  | 8                             |
| Bolivia        | 933.2    | 2100            | 164.20      | 57.603                 | 0.57  | 9                             |
| Botswana       | 4395     | 2230            | 176.10      | 43.112                 | 0.573 | 10                            |
| Brazil         | 3729     | 3120            | 171.70      | 76.426                 | 0.645 | 10                            |
| Burkina        | 281      | 2233            | 172.80      | 15.993                 | 0.378 | 19                            |
| Cabo Verde     | 3323     | 2530            | 169.00      | 45.689                 | 0.572 | 13                            |
| Cambodia       | 397      | 2180            | 162.50      | 16.590                 | 0.391 | 11                            |
| Cameroon       | 776      | 2240            | 171.00      | 42.076                 | 0.44  | 11                            |
| <b>Canada</b>  | 23609    | 3530            | 179.60      | 77.989                 | 0.858 | 6                             |
| Chad           | 357      | 2010            | 173.30      | 20.944                 | 0.332 | 17                            |
| Chile          | 9385     | 2960            | 173.10      | 84.716                 | 0.731 | 5                             |
| China          | 880      | 2990            | 171.50      | 31.646                 | 0.544 | 6                             |
| Colombia       | 2327     | 2690            | 170.60      | 69.578                 | 0.625 | 9                             |
| Congo          | 1184     | 2570            | 168.40      | 56.124                 | 0.512 | 17                            |
| <b>Denmark</b> | 32112    | 3410            | 183.20      | 85.011                 | 0.88  | 5                             |
| Djibouti       | 2075     | 1981            | 168.90      | 75.834                 | 0.365 | 18                            |
| Egypt          | 954      | 3160            | 171.30      | 43.265                 | 0.584 | 12                            |
| <b>Finland</b> | 25550    | 3220            | 178.20      | 79.641                 | 0.82  | 4                             |

|                             |        |      |        |        |       |    |
|-----------------------------|--------|------|--------|--------|-------|----|
| Gabon                       | 5151   | 2710 | 169.70 | 73.040 | 0.626 | 14 |
| <b>Germany</b>              | 25273  | 3540 | 180.50 | 73.174 | 0.828 | 7  |
| Ghana                       | 414    | 2900 | 170.00 | 39.910 | 0.471 | 11 |
| <b>Greece</b>               | 13442  | 3710 | 177.30 | 72.239 | 0.779 | 8  |
| Guatemala                   | 1559   | 2150 | 160.80 | 42.959 | 0.518 | 13 |
| Guinea                      | 256    | 2550 | 169.50 | 29.394 | 0.526 | 12 |
| Guyana                      | 1033   | 2740 | 170.50 | 29.215 | 0.572 | 22 |
| Haiti                       | 434    | 1850 | 171.50 | 32.824 | 0.43  | 21 |
| Honduras                    | 988    | 2610 | 164.70 | 42.784 | 0.532 | 9  |
| India                       | 471    | 2360 | 164.40 | 26.606 | 0.462 | 30 |
| Indonesia                   | 940    | 2550 | 164.00 | 35.623 | 0.569 | 9  |
| Iran                        | 2848   | 3050 | 172.40 | 59.949 | 0.616 | 7  |
| <b>Ireland</b>              | 25338  | 3590 | 176.60 | 58.112 | 0.816 | 6  |
| <b>Italy</b>                | 20173  | 3650 | 174.50 | 67.131 | 0.798 | 6  |
| Jamaica                     | 4796   | 2642 | 173.60 | 50.477 | 0.686 | 9  |
| <b>Japan</b>                | 29923  | 2800 | 171.70 | 79.799 | 0.836 | 8  |
| Jordan                      | 4560   | 3000 | 170.30 | 74.833 | 0.664 | 10 |
| Kenya                       | 795    | 2030 | 171.20 | 18.555 | 0.46  | 11 |
| Lesotho                     | 456    | 2460 | 167.40 | 16.848 | 0.468 | 14 |
| Liberia                     | 207    | 2200 | 167.30 | 45.751 | 0.359 | 14 |
| Madagascar                  | 266    | 2130 | 162.90 | 25.018 | 0.456 | 14 |
| Malawi                      | 195    | 2150 | 166.20 | 12.729 | 0.312 | 16 |
| Mali                        | 314    | 2590 | 172.20 | 25.935 | 0.273 | 23 |
| Mexico                      | 4640   | 3260 | 167.80 | 72.626 | 0.673 | 9  |
| Morocco                     | 1368   | 3260 | 170.30 | 50.198 | 0.493 | 11 |
| Mozambique                  | 288    | 2070 | 165.20 | 25.020 | 0.259 | 14 |
| Myanmar                     | 1255   | 2166 | 161.30 | 26.134 | 0.388 | 15 |
| Namibia                     | 2457   | 2360 | 171.30 | 30.701 | 0.567 | 14 |
| Nepal                       | 227    | 2340 | 163.00 | 11.017 | 0.417 | 21 |
| <b>Netherlands</b>          | 26754  | 3000 | 182.70 | 73.556 | 0.877 | 4  |
| Nicaragua                   | 932    | 2420 | 166.40 | 53.421 | 0.53  | 12 |
| Niger                       | 221    | 2390 | 170.70 | 15.618 | 0.236 | 17 |
| Nigeria                     | 470    | 2710 | 169.50 | 31.984 | 0.493 | 14 |
| Norway                      | 39135  | 3450 | 179.70 | 74.080 | 0.883 | 5  |
| Panama                      | 7589   | 2450 | 170.00 | 57.732 | 0.682 | 10 |
| Peru                        | 1900.5 | 2410 | 164.20 | 70.732 | 0.645 | 11 |
| Philippines                 | 2140   | 2580 | 165.60 | 45.857 | 0.605 | 20 |
| Portugal                    | 11091  | 3580 | 172.10 | 51.014 | 0.765 | 8  |
| Korea                       | 11201  | 3040 | 171.90 | 74.183 | 0.622 | 23 |
| Rwanda                      | 262    | 2090 | 167.20 | 11.112 | 0.288 | 9  |
| Senegal                     | 598    | 2280 | 174.30 | 39.328 | 0.374 | 18 |
| Sierra Leona                | 631    | 2120 | 165.80 | 34.222 | 0.28  | 18 |
| South Africa                | 24243  | 3000 | 168.10 | 54.368 | 0.626 | 15 |
| <b>Spain</b>                | 15589  | 3260 | 175.60 | 75.678 | 0.792 | 6  |
| Sri Lanka                   | 9760   | 2370 | 165.80 | 18.513 | 0.649 | 22 |
| Swaziland                   | 1538   | 2290 | 170.20 | 22.028 | 0.516 | 9  |
| <b>Sweden</b>               | 28825  | 3110 | 180.40 | 83.705 | 0.856 | 4  |
| Togo                        | 306    | 2150 | 167.70 | 30.618 | 0.414 | 15 |
| Trinidad                    | 9888   | 2771 | 174.40 | 9.755  | 0.695 | 23 |
| Uganda                      | 281    | 2220 | 169.30 | 11.203 | 0.351 | 12 |
| <b>United Arab emirates</b> | 69799  | 3170 | 169.10 | 80.288 | 0.762 | 15 |
| <b>United Kingdom</b>       | 23344  | 3450 | 176.80 | 78.837 | 0.819 | 8  |
| Tanzania                    | 282    | 2020 | 166.90 | 20.535 | 0.381 | 13 |
| <b>USA</b>                  | 30453  | 3750 | 179.00 | 77.101 | 0.871 | 8  |
| Viet Nam                    | 1224   | 2780 | 160.00 | 22.851 | 0.525 | 9  |
| Yemen                       | 1300   | 2050 | 167.60 | 23.465 | 0.421 | 32 |
| Zambia                      | 474.7  | 1880 | 168.20 | 37.817 | 0.418 | 12 |
| Zimbabwe                    | 562.7  | 2210 | 171.00 | 30.193 | 0.464 | 11 |



**Table S4. Parameter estimates of the differences in cohorts model, for the 1960s, 1970s and 1980s cohorts. The second column indicates the probability that a coefficient is different from zero. The results are based on an MCMC using Zellner's g-prior (Zellner 1986) and using 40,000 draws, with the first 20,000 discarded as burn-in. To assess convergence of the posterior chain, we used Geweke's test statistic (Geweke 1992), which indicated convergence with a value of 1.02.**

|                        | p!=0 | EV      | SD     | Model 1   | Model 2   | Model 3   | Model 4   | Model 5   |
|------------------------|------|---------|--------|-----------|-----------|-----------|-----------|-----------|
|                        | (a)  | (b)     | (c)    | (d)       | (e)       | (f)       | (g)       | (h)       |
| P intake               | 20.3 | 0.0192  | 0.0943 |           |           |           |           |           |
| N intake               | 23.4 | 0.0495  | 0.1317 |           |           |           | 0.2066    |           |
| Diff. GDP              | 60.7 | 0.1762  | 0.1699 | 0.2591    | 0.2643    | 0.3163    |           | 0.3938    |
| Diff. GDP growth       | 39.7 | 0.0738  | 0.1084 |           | 0.2225    |           |           | 0.1827    |
| Diff. calories         | 7.8  | 0.0020  | 0.0297 |           |           |           |           |           |
| Diff. P intake         | 74.6 | 0.4274  | 0.2920 | 0.6360    | 0.5837    | 0.5626    | 0.6346    | 0.5321    |
| Diff. N intake         | 35.9 | 0.1077  | 0.1714 |           |           |           |           |           |
| Diff. P animals/plants | 25.5 | 0.0366  | 0.0898 |           |           |           |           | 0.1946    |
| Diff. N animals/plants | 54.9 | 0.1191  | 0.1305 | 0.2298    | 0.2196    |           | 0.2414    |           |
| Diff. N/P intake       | 89.8 | 0.4848  | 0.2452 | 0.6556    | 0.6111    | 0.6893    | 0.6100    | 0.6506    |
| Diff. urban population | 14.0 | -0.0063 | 0.0379 |           |           |           |           |           |
| 1970-1980 dummy        | 45.3 | -0.0931 | 0.1211 | -0.2373   |           | -0.2122   | -0.2263   |           |
| nVar                   |      |         |        | 6         | 6         | 5         | 6         | 6         |
| BIC                    |      |         |        | -238.5341 | -238.9414 | -239.7897 | -239.7931 | -239.8170 |
| post. prob.            |      |         |        | 0.0741    | 0.0526    | 0.0154    | 0.0226    | 0.0134    |
| n                      |      |         |        | 108       | 108       | 108       | 108       | 108       |

## Bayesian model averaging

The core idea of Bayesian model averaging is to address the model uncertainty over the model space, in terms of choice of explanatory variables, as well as the estimation of the parameters of interest and the size of the model. As established in the pioneering work of Jeffreys (1961), Bayesian model averaging is a practical application of Bayes' rule, by aiming to carry out inference using weighted averaged posterior distributions across alternative models in the model space  $M$ .  $M$  contains all the potential model combinations formed by the covariates. Given  $k$  covariates the full combination would be  $2^k$  potential models, which is the cardinality of  $M$ .

Let us denote a particular model  $M_m \in M$  (for  $m = 1, \dots, 2^k$ ). We can characterize this model by its parameter vector  $\boldsymbol{\beta} = [\beta_1, \dots, \beta_k]$ . The posterior density for the parameter vector  $\boldsymbol{\beta}$ , conditional on the model  $M_m$  can be expressed as:

$$(1) \quad p(\boldsymbol{\beta}|M_m, D) = \frac{p(D|\boldsymbol{\beta}, M_m)p(\boldsymbol{\beta}|M_m)}{p(D|M_m)}$$

where  $D$  denotes the data, the prior of  $\boldsymbol{\beta}$  is denoted by  $p(\boldsymbol{\beta}|M_m)$  and  $p(D|\boldsymbol{\beta}, M_m)$  denotes the likelihood. The most frequently used prior for  $\boldsymbol{\beta}$  is the g-prior specification by Zellner (1986), since it leads to convenient analytical solutions and enables fast computation of model posteriors.

The candidate models  $M_m$  are treated as random in Bayesian model averaging, thus the posterior model probability  $p(M_m|D)$  can be expressed by

$$(2) \quad p(M_m|D) = \frac{p(D|M_m)p(M_m)}{p(D)} \propto p(D|M_m)p(M_m)$$

where  $p(M_m)$  denotes the model prior. A natural, fairly agnostic choice for such a prior would be a uniform prior specification in the form of  $p(M_m) = 2^{-q}$ . This treats all candidate models as equally likely a priori.  $p(D|M_m)$  denotes the marginal likelihood of model  $M_m$  and is specified as:

$$(3) \quad p(D|M_m) = \int_0^\infty \int_{-\infty}^\infty p(D|\boldsymbol{\beta}, M_m) p(\boldsymbol{\beta}|M_m) d\boldsymbol{\beta} d\sigma^2$$

where the use of the g-prior allows for analytical integration over all the parameters. Using the law of total probability, Bayesian model averaging consists of producing weighted averaged parameter estimates with the posterior model probabilities  $p(M_m|D)$  as weights, which are proportional to the Bayesian Information Criterion (BIC), see Raftery (1995). Thus, we can specify the posterior density of the parameters as

$$(4) \quad p(\boldsymbol{\beta}|D) = \sum_{m=1}^{2^k} p(M_m|D)p(\boldsymbol{\beta}|M_m, D).$$

If  $k$  is large, the number of terms in this equation can quickly rise in such a way that exhaustive summation is infeasible. To circumvent this problem, Markov Chain Monte Carlo techniques can be used, in order to approximate the posterior density. For an overview see Madigan et al. (1995).

## References

Geweke, J. (1992) Evaluating the accuracy of sampling-based approaches to the calculation of posterior moments. In: Bernardo, J.M., Berger J.O., Dawid, A.P. and Smith, A.F.M., (eds.) Bayesian Statistics. Oxford University Press, Oxford, 4th edition, 167–193.

Jeffreys, H. (1961) Theory of probability. 3rd edition. Clarendon Press, Oxford.

Leamer, E.E. (1978), Specification Searches: Ad Hoc Inference with Nonexperimental Data. Wiley & Sons, New York.

Madigan, D., York, J., Allard, D. (1995) Bayesian graphical models for discrete data. International Statistical Review 63(2), 215–232.

Raftery, A.E. (1995) Bayesian model selection in social research. Sociological Methodology 25, 111–163.

Sala-i-Martin, X., Doppelhofer, G., Miller, R. (2004) Determinants of long-term growth: A Bayesian Averaging of Classical Estimates (BACE) approach. American Economic Review 94(4), 813-835.



Zellner, A. (1986) Bayesian Inference and Decision Techniques: Essays in Honor of Bruno de Finetti, chapter, On Assessing Prior Distributions and Bayesian Regression Analysis with g-Prior Distributions. North-Holland, Amsterdam-

Figure S1. Relationships of mean male height with the average annual daily calories intake (a), GDP (b), HDI (c) and % of low weight infants at birth (d) in the corresponding country and cohort. See the caption for Figure 1 for the country abbreviations. Men born in the 1960s, 1970s and 1980s are identified by 6, 7 and 8 in the symbols, respectively. The countries with higher N and P intake from animal than vegetal products are indicated in red (also red arrow for the mean), and the countries with higher N and P intake from vegetal products are indicated in blue (also the arrow for the mean). Different letters on the axes indicate significant differences ( $P < 0.05$ ).

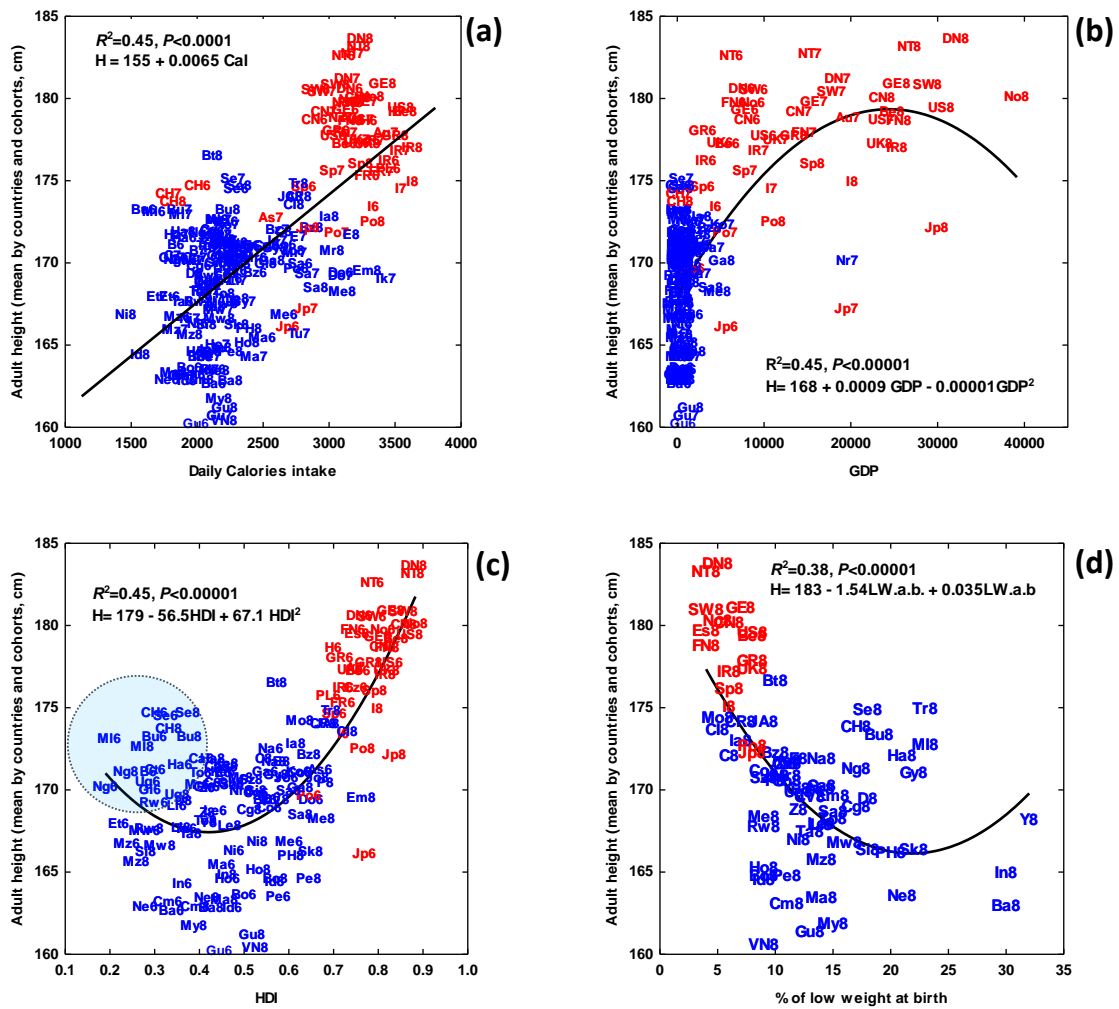



Figure S2. Structural model with differences (men cohort of 1980s) between all pairwise comparisons of the 80 countries studied of GDP, HDI, per capita annual N, P and N:P ratio intake, daily per capita calories intake and % of low weight infants at birth as exogenous variables and the corresponding differences in adult men height as endogenous variable.

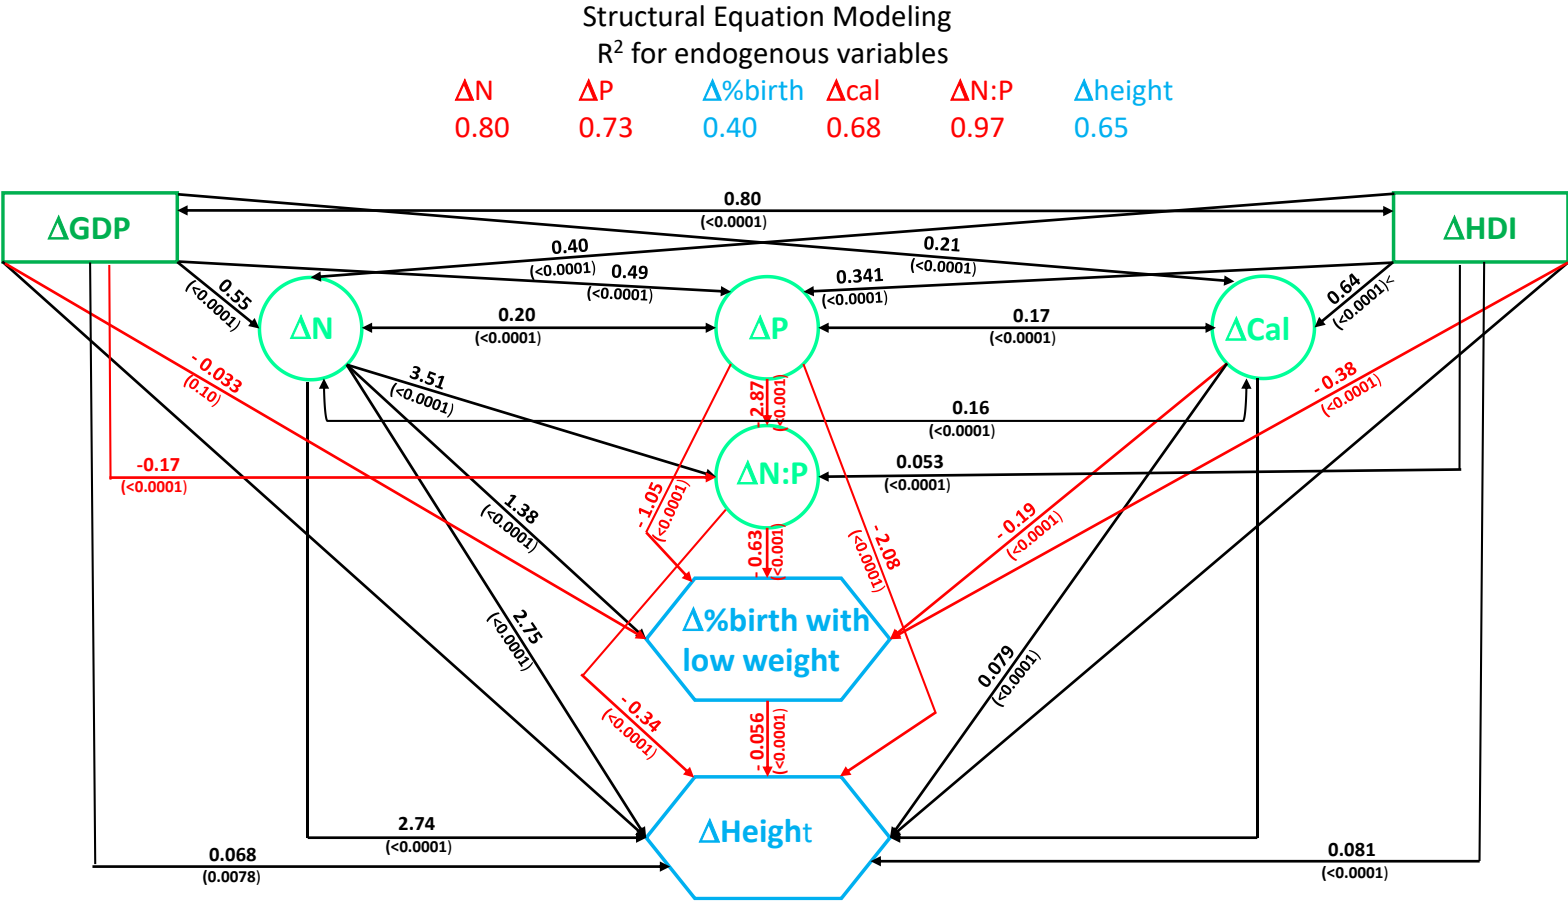

## Additional Bayesian analyses also considering possible roles of % of low weight infants at birth and HDI

We modeled human height in absolute levels and across the cohorts with a Bayesian model averaging approach. For this purpose we had observations from 75 countries. The average male human height in a country  $i$  in cohort  $t$  was modeled as:

$$\begin{aligned} height_{it} = \sum_{k=1}^2 & \left[ \beta_1 + \alpha_t + \beta_2 N_{it} + \beta_3 P_{it} + \beta_4 GDP_{it} + \beta_5 GDPg_{it} + \beta_6 Cal_{it} + \beta_7 N_{it} + \beta_8 P_{it} + \beta_9 \frac{N}{P}_{it} \right. \\ & \left. + \beta_{10} P_{animal}/P_{vegetables}_{it} + \beta_{11} N_{animal}/N_{vegetables}_{it} + \beta_{12} Urban_{it} + \beta_{13} w_{it} + \beta_{14} HDI_{it} \right] I_{(\omega_{itk}=1)} + \varepsilon_{it} \end{aligned}$$

where  $height_{it}$  denotes the height of the  $t$ -th cohort in country  $i$ . As in the previous equation,  $\beta_1$  is the intercept,  $\alpha_t$  a period specific dummy,  $N_{it}$  and  $P_{it}$  are the levels of N and P intake per capita in cohort  $t$ ,  $GDP_{it}$ ,  $GDPg_{it}$ ,  $Cal_{it}$ , and  $Urban_{it}$  denote the level of GDP, GDP growth, calories and percentage of urban population, respectively.  $w_{it}$  and  $HDI_{it}$  denote the percentage of low birth-weights and the HDI in country  $i$  in cohort  $t$ . The ratios of N and P intake, as well as N and P intake from animals in proportion to plants are denoted by  $P_{animal}/P_{vegetables}_{it}$ , and  $N_{animal}/N_{vegetables}_{it}$ , respectively.  $\beta_2$  to  $\beta_{14}$  are the corresponding coefficients, and  $\varepsilon_{it}$  is the i.i.d. normally distributed error term with zero mean and  $\sigma^2$  variance.  $I_{(\cdot)}$  denotes an indicator function, which takes on the value of one if the condition  $\omega_{itk} = 1$  is fulfilled and is zero otherwise.  $\omega_{it1}$  takes on the value of one if the sum of the N

intake from animals per the N intake from plants plus the P intake from animals per the P intake from plants exceeds two and is zero otherwise. In this fashion we can model the impacts of both groups in one joint model, with a joint variance function.

**Table S5. Parameter estimates of the levels model, for the 1980s cohort. The second column indicates the probability that a coefficient is different from zero. The results are based on an MCMC using Zellner's g-prior (Zellner 1986) and using 40,000 draws, with the first 20,000 discarded as burn-in. To assess convergence of the posterior chain, we used Geweke's test statistic (Geweke 1992), which indicated convergence with a value of 1.07.**

|                       | p!=0  | EV      | SD     | Model 1   | Model 2   | Model 3   | Model 4   | Model 5   |
|-----------------------|-------|---------|--------|-----------|-----------|-----------|-----------|-----------|
| Intercept             | 100.0 | 0.0000  | 0.0046 | 0.0000    | 0.0000    | 0.0000    | 0.0000    | 0.0000    |
| GDP                   | 22.4  | 0.0543  | 0.0281 |           |           |           | 0.1557    | 0.1528    |
| GDP growth            | 8.7   | -0.0013 | 0.0069 |           |           |           |           |           |
| per capita Calories   | 12.3  | 0.0172  | 0.0184 |           |           |           |           |           |
| per capita P intake   | 9.7   | 0.0341  | 0.0103 |           |           |           |           |           |
| per capita N intake   | 81.6  | 0.4125  | 0.0893 | 0.5402    | 0.5114    | 0.5147    | 0.4051    | 0.3790    |
| N/P from animals      | 40.1  | -0.0764 | 0.0411 |           | -0.1550   |           |           | -0.1542   |
| N/P from plants       | 26.6  | -0.0194 | 0.0311 |           |           | -0.1366   |           |           |
| per capita N/P        | 97.0  | 0.3239  | 0.0867 | 0.3292    | 0.3106    | 0.3188    | 0.3311    | 0.3124    |
| pct. Urban population | 8.5   | 0.0011  | 0.0090 |           |           |           |           |           |
| pct. Low birth weight | 11.1  | -0.0081 | 0.0104 |           |           |           |           |           |
| HDI                   | 8.8   | -0.0020 | 0.0122 |           |           |           |           |           |
| nVar                  |       |         |        | 3         | 4         | 4         | 4         | 5         |
| BIC                   |       |         |        | -139.3510 | -143.8279 | -144.3053 | -145.4511 | -149.9135 |

---

---

|             |        |        |        |        |        |
|-------------|--------|--------|--------|--------|--------|
| post. prob. | 0.1702 | 0.1451 | 0.0900 | 0.0286 | 0.0248 |
| n           | 75     | 75     | 75     | 75     | 75     |

---

---

Figure S3. Posterior densities of coefficient impacts for the differences in the 1960s, 1970s and 1980s cohorts, ordered by posterior inclusion probability. A high density mass at zero (signified by the vertical dashed line) corresponds to a high probability of the coefficient being excluded from the model. The bold, continuous colored lines denote the median posterior impact of the coefficient, conditional on its posterior inclusion probability. The dashed colored lines depict +/- two posterior standard deviations, conditional on the coefficient being included in the model.

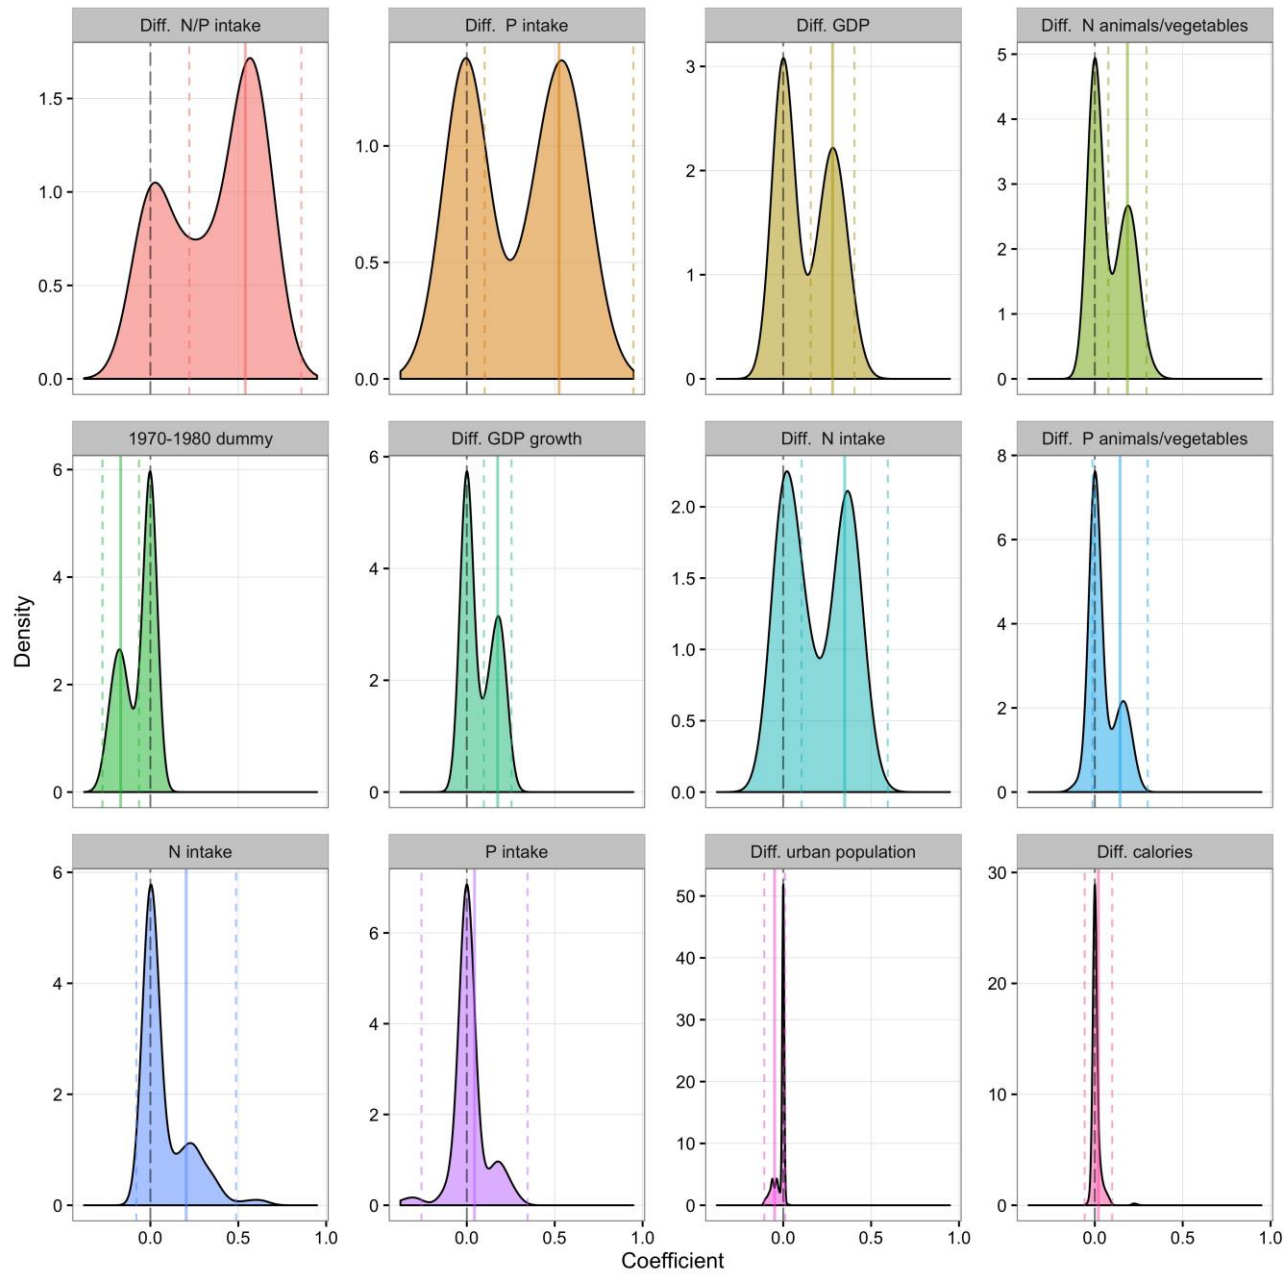

Supplement: 41598_2017_17880_MOESM1_ESM.pdf [file 41598_2017_17880_MOESM1_ESM.pdf]
